# Supplementary material for: Osteoporosis Is Associated with an Increased Risk of Colorectal Neoplasms Regardless of Sex: Nationwide Population-Based Cohort Study
Source: MDPI journal article supplement (doi:10.3390/diagnostics14060666), 2024-03-21
Supplement: s1 [file s1]

**Supplementary Table S1.** NHSP participants among NHIS cohort who underwent BMD (n=35,099)

| Variables              | Total, n (%)  | Osteoporosis, n (%) |                | p value  |
|------------------------|---------------|---------------------|----------------|----------|
|                        | (n=35,099)    | No (n=4,609)        | Yes (n=30,490) |          |
| Colonic neoplasms      |               |                     |                | < 0.0001 |
| No                     | 31,001 (88.3) | 4,190 (90.9)        | 26,811 (87.9)  |          |
| Yes                    | 4,098 (11.7)  | 419 (9.1)           | 3,679 (12.1)   |          |
| Low grade adenoma      |               |                     |                | < 0.0001 |
| No                     | 31,560 (89.9) | 4,231 (91.8)        | 27,329 (89.6)  |          |
| Yes                    | 3,539 (10.1)  | 378 (8.2)           | 3,161 (10.4)   |          |
| High grade adenoma/CIS |               |                     |                | 0.3368   |
| No                     | 35,015 (99.8) | 4,595 (99.7)        | 30,420 (99.8)  |          |
| Yes                    | 84 (0.2)      | 14 (0.3)            | 70 (0.2)       |          |
| Non-invasive CRN       |               |                     |                | < 0.0001 |
| No                     | 31,501 (89.7) | 4,222 (91.6)        | 27,279 (89.5)  |          |
| Yes                    | 3,598 (10.3)  | 387 (8.4)           | 3,211 (10.5)   |          |
| Invasive CRC           |               |                     |                | < 0.0001 |
| No                     | 34,373 (97.9) | 4,555 (98.8)        | 29,818 (97.8)  |          |
| Yes                    | 726 (2.1)     | 54 (1.2)            | 672 (2.2)      |          |
| Sex                    |               |                     |                | < 0.0001 |
| Male                   | 5,524 (15.7)  | 2,151 (46.7)        | 3,373 (11.1)   |          |
| Female                 | 29,575 (84.3) | 2,458 (53.3)        | 27,117 (88.9)  |          |
| Age, years             |               |                     |                | < 0.0001 |
| 50–54                  | 5,017 (14.3)  | 1,354 (29.4)        | 3,663 (12.0)   |          |
| 55–59                  | 5,992 (17.1)  | 969 (21.0)          | 5,023 (16.5)   |          |
| 60–64                  | 6,603 (18.8)  | 688 (14.9)          | 5,915 (19.4)   |          |
| 65–69                  | 7,578 (21.6)  | 588 (12.8)          | 6,990 (22.9)   |          |
| 70–74                  | 5,627 (16.0)  | 557 (12.1)          | 5,070 (16.6)   |          |
| 75–79                  | 2,905 (8.3)   | 302 (6.5)           | 2,603 (8.5)    |          |
| ≥ 80                   | 1,377 (3.9)   | 151 (3.3)           | 1,226 (4.0)    |          |
| CCI                    |               |                     |                | < 0.0001 |
| 0                      | 8,523 (24.3)  | 1,084 (23.5)        | 7,439 (24.4)   |          |
| 1                      | 9,349 (26.6)  | 1,068 (23.2)        | 8,281 (27.2)   |          |
| 2                      | 7,318 (20.9)  | 906 (19.7)          | 6,412 (21.0)   |          |
| 3 or more              | 9,099 (28.2)  | 1,551 (33.6)        | 8,358 (27.4)   |          |
| Income level           |               |                     |                | 0.2765   |
| 0–3                    | 8,739 (24.9)  | 1,120 (24.3)        | 7,619 (25.0)   |          |
| 4–7                    | 11,983 (34.1) | 1,552 (33.7)        | 10,431 (34.2)  |          |
| 8–10                   | 14,377 (41.0) | 1,937 (42.0)        | 12,440 (40.8)  |          |
| BMI group              |               |                     |                | < 0.0001 |
| ≤ 22.9                 | 14,100 (40.2) | 1,521 (33.0)        | 12,579 (41.2)  |          |
| 23–24.9                | 8,935 (25.4)  | 1,230 (26.7)        | 7,705 (25.3)   |          |
| ≥ 25                   | 12,064 (34.4) | 1,858 (40.3)        | 10,206 (33.5)  |          |
| Smoking                |               |                     |                | < 0.0001 |
| non                    | 30,808 (87.8) | 3,196 (69.3)        | 27,612 (90.6)  |          |
| ex-                    | 2,209 (6.3)   | 870 (18.9)          | 1,339 (4.4)    |          |
| current                | 2,082 (5.9)   | 543 (11.8)          | 1,539 (5.0)    |          |
| Alcohol                |               |                     |                | < 0.0001 |
| No                     | 28,714 (81.8) | 2,905 (63.0)        | 25,809 (84.6)  |          |
| Yes                    | 6,385 (18.2)  | 1,704 (37.0)        | 4,681 (15.4)   |          |

BMD, bone mineral density; BMI, body mass index; CCI, Charlson comorbidity index; CIS, carcinoma in situ; CRC, colorectal cancer; CRN, colorectal neoplasm; NHSP, National Health Screening Program; NHIS, National Health Insurance Service
